# Supplementary material for: Amyloid precursor protein-fragments-containing inclusions in cardiomyocytes with basophilic degeneration and its association with cerebral amyloid angiopathy and myocardial fibrosis
Source: PubMed Central journal article supplement (PMC6226444; doi:10.1038/s41598-018-34808-7), 2018-11-09

## Supplementary material (Data, Tables, Figure)

### Amyloid precursor protein-fragments-containing inclusions in cardiomyocytes with basophilic degeneration and its association with cerebral amyloid angiopathy and myocardial fibrosis

Lara Maria Krämer<sup>1</sup>, Johannes Brettschneider<sup>2</sup>, Jochen K. Lennerz<sup>1,3</sup>, Daniel Walcher<sup>4</sup>, Lubin Fang<sup>5</sup>, Angela Rosenbohm<sup>5</sup>, Karthikeyan Balakrishnan<sup>1,6</sup>, Julian Benckendorff<sup>1</sup>, Peter Möller<sup>1</sup>, Steffen Just<sup>4</sup>, Michael Willem<sup>7</sup>, Albert C. Ludolph<sup>5</sup>, Dietmar Rudolf Thal<sup>1,8,9</sup>

1 Institute of Pathology, Ulm University, Ulm, Germany

2 RehaClinic Lucerne, Switzerland

3 Department of Pathology, Massachusetts General Hospital/Harvard Medical School, Boston, MA, USA

4 Department of Internal Medicine II (Cardiology), Ulm University, Ulm, Germany

5 Department of Neurology, Ulm University, Ulm, Germany

6 Department of Gene Therapy, Ulm University, Ulm, Germany

7 Biomedical Center, Ludwig-Maximilians-Universität Munich, Germany

8 Department of Neuroscience and Leuven Brain Institute, KU-Leuven, Leuven, Belgium

9 Department of Pathology, UZ-Leuven, Leuven, Belgium

#### Legends:

**Supplementary Table 1:** List of cases. (Data)

**Supplementary Table 2:** List of proteins observed for its presence in p62/SQSTM1-positive BD inclusions in cardiomyocytes and the respective antibodies used for this purpose.

**Supplementary Fig. 1:** Positive controls for immunohistochemistry (**A-D** visualized with avidin-biotin complex and DAB, **E-H** visualized with carbocyanine (Cy) labelled secondary antibodies): **A:** p62/SQSTM1-staining of cytoplasmic dipeptide repeat inclusions in CA4 neurons (arrows) of a case with ALS carrying a C9orf72 hexanucleotide mutation. The lacking nuclear signal serves as intrinsic negative control. **B, C:** Neuritic plaques (arrows) and less strongly the neuropil and the cytoplasm of neurons of AD brain (**B:** temporal neocortex; **C:** hippocampal sector CA1) are marked with the antibodies against the N-terminus of APP (22C11) (**B**) and the A $\eta$  region of APP (D-epitope antibody) (**C**). The nuclei are not stained and serve as intrinsic negative controls. **D:** The anti-A $\beta$ <sub>1-17</sub> antibody 6E10 clearly stains amyloid plaques (arrows) in AD temporal neocortex whereas the neighboring neuropil remains negative. **E, F:** Dipeptide inclusions in the granule cell layer of the cerebellum of an ALS case carrying the C9orf72 hexanucleotide repeat mutation stained with the p62/SQSTM1 antibody visualized with Carbocyanin-5 (Cy5)-labelled secondary antibodies (**E**) and with the ubiquitin antibody-coupled on biotinylated anti-mouse Fab fragments and labelled with Cy2-conjugated streptavidin (**F**). The inclusions stained with both antibodies in this double labelled section are indicated by arrowheads. Ubiquitin antibodies also mark other lesions that are not detected by the p62/SQSTM1 antibody. **G:** The antibody against the M-epitope of the APP-A $\eta$  region stains a neuritic plaque with dystrophic neurites (arrowheads) in the parietal cortex of an AD brain (the original Cy 3 color is shown here; the image is not recoded into blue as it is done for triple label immunofluorescence figures!). **H:** Amyloid plaque (arrowhead) in the parietal cortex of an AD brain detected with the polyclonal A $\beta$  antibody 3552 visualized with Cy3-labelled secondary antibodies (the original color is shown here; the image is not recoded into blue as it is done for triple label immunofluorescence figures!).

| Supplementary Tab. 1: List of cases (Data) |             |     |             |                |             |                               |                                                                                                                                                                                                       |                                                                                                                                                                                |                                                                                                                              |              |                                                      |           |                          |                  |                       |                   |         |                     |                       |                               |                                                    |                                                      |              |      |                      |      |      |     |
|--------------------------------------------|-------------|-----|-------------|----------------|-------------|-------------------------------|-------------------------------------------------------------------------------------------------------------------------------------------------------------------------------------------------------|--------------------------------------------------------------------------------------------------------------------------------------------------------------------------------|------------------------------------------------------------------------------------------------------------------------------|--------------|------------------------------------------------------|-----------|--------------------------|------------------|-----------------------|-------------------|---------|---------------------|-----------------------|-------------------------------|----------------------------------------------------|------------------------------------------------------|--------------|------|----------------------|------|------|-----|
| Case number                                | Age (years) | SEX | AJMTL phase | Brak NfT stage | CERAD score | NIA-AA degree of AD pathology | clinical diagnosis                                                                                                                                                                                    | pathological diagnosis                                                                                                                                                         | neuropathological diagnosis                                                                                                  | CAA severity | Expansion of atherosclerosis in the cricte of Willis | SVD Stage | Intracerebral hemorrhage | brain infarction | arterial hypertension | diabetes mellitus | Obesity | atrial fibrillation | myocardial infarction | degree of myocardial fibrosis | degree of hypertension-related myocardial fibrosis | BD (p62-positive) inclusion bodies / mm <sup>2</sup> | Heart weight | BMI  | hyperlipoproteinemia | CDR  | GDS  | PMI |
| 1                                          | 68          | m   | 2           | 2              | 0           | 1                             | ALS, prostate carcinoma, arterial hypertension                                                                                                                                                        | ALS                                                                                                                                                                            | ALS, SVD, hypoxemia in CA1                                                                                                   | 2            | 36,36                                                | 2         | no                       | no               | yes                   | no                | yes     | no                  | no                    | 2                             | 2                                                  | 0,2201                                               | 365          | n.k. | no                   | 0    | 1    | 144 |
| 2                                          | 54          | m   | 0           | 0              | 0           | 0                             | CLL, stem cell transplantation with GVHD, GBS, arterial hypertension, muscular atrophy                                                                                                                | CLL, myocardial hypertrophy, pneumonia                                                                                                                                         | Bergmann cell gliosis, neurogenic muscular atrophy, meningioma anterior cervical root WHD*1                                  | 0            | 0,00                                                 | 0         | no                       | no               | yes                   | no                | no      | no                  | 2                     | 2                             | 0,0262                                             | 545                                                  | 22,7         | no   | 0                    | 1    | 72   |     |
| 3                                          | 60          | m   | 0           | 0              | 0           | 0                             | HD, kachexia, pneumonia                                                                                                                                                                               | HD, pneumonia                                                                                                                                                                  | HD                                                                                                                           | 0            | 0,00                                                 | 2         | no                       | no               | no                    | no                | n.k.    | no                  | 0                     | 0                             | 0                                                  | 0,0017                                               | 340          | n.k. | n.k.                 | n.k. | n.k. | 24  |
| 4                                          | 73          | f   | 0           | 3              | 0           | 0                             | Carcinoma with unknown primary tumor, kachexia, osteolysis                                                                                                                                            | plasmocytoma                                                                                                                                                                   | extradural plasmocytoma, neurogenic muscular atrophy                                                                         | 0            | 45,45                                                | 1         | no                       | no               | no                    | no                | n.k.    | no                  | 2                     | 0                             | 0,0312                                             | 280                                                  | n.k.         | n.k. | n.k.                 | n.k. | 24   |     |
| 5                                          | 76          | f   | 0           | 2              | 0           | 0                             | Asthma bronchialis, pulmonary emphysema of the lung, ALS, arterial hypertension                                                                                                                       | pulmonary emphysema, atherosclerosis, ALS                                                                                                                                      | ALS, AGD, neurogenic muscular atrophy                                                                                        | 0            | 50,00                                                | 3         | no                       | no               | yes                   | n.k.              | n.k.    | no                  | 2                     | 2                             | 0,0670                                             | 330                                                  | n.k.         | n.k. | 0                    | 1    | 48   |     |
| 6                                          | 64          | f   | 0           | 3              | 0           | 0                             | Spinocerebellar syndrome, sepsis-associated encephalopathy, arterial hypertension, colovaginitis, CML?                                                                                                | CML, sepsis-induced multiple organ failure                                                                                                                                     | PD                                                                                                                           | 1            | n.d.                                                 | 0         | no                       | no               | yes                   | no                | no      | no                  | 2                     | 2                             | 0,1841                                             | 280                                                  | 24,0         | no   | 0,5                  | 1    | 12   |     |
| 7                                          | 51          | m   | 0           | 0              | 0           | 0                             | Malignant melanoma, esophageal carcinoma, limbic encephalitis, pneumonia                                                                                                                              | Status after melanoma surgery, esophageal carcinoma, pneumonia                                                                                                                 | paraneoplastic limbic encephalitis                                                                                           | 0            | 33,33                                                | 0         | no                       | no               | no                    | no                | no      | no                  | 2                     | 0                             | 0,0083                                             | 400                                                  | n.k.         | no   | 3                    | 7    | 72   |     |
| 8                                          | 75          | m   | 1           | 2              | 1           | 1                             | ALS                                                                                                                                                                                                   | ALS                                                                                                                                                                            | ALS, CAA, SVD                                                                                                                | 2            | 45,45                                                | 2         | no                       | no               | no                    | n.k.              | n.k.    | no                  | 0                     | 0                             | 0,0683                                             | 385                                                  | n.k.         | n.k. | 0                    | 1    | 24   |     |
| 9                                          | 62          | m   | 0           | 1              | 0           | 0                             | alcohol abuse, liver cirrhosis, carcinoma with unknown primary tumor                                                                                                                                  | carcinoma                                                                                                                                                                      | normal brain                                                                                                                 | 0            | 8,09                                                 | 2         | no                       | no               | no                    | no                | no      | no                  | 2                     | 0                             | 0,0306                                             | 410                                                  | 24,8         | no   | 0                    | 1    | 12   |     |
| 10                                         | 83          | m   | 0           | 2              | 0           | 0                             | coronary heart disease, myocardial infarction, chronic renal insufficiency, atrial fibrillation                                                                                                       | hypertensive heart disease, biventricular cardiac insufficiency, atherosclerosis, coronary heart disease                                                                       | SVD, atherosclerosis, multiple old brain infarcts                                                                            | 0            | 81,82                                                | 3         | no                       | yes              | yes                   | no                | yes     | yes                 | 3                     | 3                             | 0,0153                                             | 520                                                  | 25,3         | no   | 2                    | 7    | 48   |     |
| 11                                         | 57          | m   | 0           | 2              | 0           | 0                             | arterial hypertension, ALS                                                                                                                                                                            | ALS                                                                                                                                                                            | ALS                                                                                                                          | 0            | 0,00                                                 | 2         | no                       | no               | yes                   | no                | yes     | no                  | 2                     | 2                             | 0,1058                                             | 525                                                  | 30,1         | no   | 0                    | 1    | 96   |     |
| 12                                         | 56          | m   | 0           | 0              | 0           | 0                             | OMI                                                                                                                                                                                                   | OMI                                                                                                                                                                            | normal brain                                                                                                                 | 0            | 36,36                                                | 2         | no                       | no               | no                    | no                | no      | no                  | 0                     | 0                             | 0,0257                                             | 350                                                  | 25,8         | no   | 0                    | 1    | 48   |     |
| 13                                         | 58          | m   | 0           | 1              | 0           | 0                             | GBS, status after varicosis surgery, pneumonia                                                                                                                                                        | pulmonary embolism                                                                                                                                                             | polyradiculitis, toxic myopathy                                                                                              | 0            | 18,18                                                | 2         | no                       | no               | yes                   | no                | yes     | no                  | 0                     | 0                             | 0,0049                                             | 530                                                  | 30,7         | no   | n.k.                 | n.k. | 48   |     |
| 14                                         | 47          | f   | 0           | 1              | 0           | 0                             | multiple sclerosis, epileptic seizures, hemiplegia, intracerebral bleeding, obsessive, hyporexia, nikotin abuse                                                                                       | pulmonary embolism, gliomuloseclerosis and renal atherosclerosis                                                                                                               | SDH, red brain infarct, atherosclerosis, multiple sclerosis lesions                                                          | 0            | 33,33                                                | 2         | yes                      | yes              | no                    | yes               | yes     | no                  | no                    | 0                             | 0                                                  | 0,0656                                               | 425          | n.k. | n.k.                 | n.k. | n.k. | 72  |
| 15                                         | 61          | m   | 1           | 2              | 0           | 1                             | ALS, pneumonia                                                                                                                                                                                        | ALS, respiratory failure                                                                                                                                                       | ALS                                                                                                                          | 0            | 0,00                                                 | 2         | no                       | no               | no                    | no                | no      | no                  | 2                     | 0                             | 0,1141                                             | 340                                                  | n.k.         | no   | 0                    | 1    | 24   |     |
| 16                                         | 53          | m   | 1           | 1              | 0           | 1                             | ARDS, pneumonia                                                                                                                                                                                       | pneumonia                                                                                                                                                                      | SVD                                                                                                                          | 0            | 0,00                                                 | 2         | no                       | no               | no                    | no                | no      | no                  | 2                     | 0                             | 0,0812                                             | 400                                                  | 22,0         | no   | 0                    | 1    | 48   |     |
| 17                                         | 45          | m   | 1           | 1              | 0           | 1                             | IgA-nephritis and terminal renal insufficiency, pneumonia, atherosclerosis                                                                                                                            | IgA-nephritis, status after renal transplantation, renal pulmonary embolism, thrombosis                                                                                        | mild SVD, inactivity related muscular atrophy                                                                                | 0            | 27,27                                                | 3         | no                       | no               | no                    | n.k.              | n.k.    | no                  | 2                     | 0                             | 0,1267                                             | 260                                                  | n.k.         | n.k. | 0                    | 1    | 24   |     |
| 18                                         | 0,0301      | m   | 0           | 0              | 0           | 0                             | hydrops fetalis, pulmonal hypoplasia                                                                                                                                                                  | hydrops fetalis, vena cava thrombosis                                                                                                                                          | amyoplasia congenita, microinfarcts in the basal ganglia, haemorrhagic signs of haemocoma                                    | 0            | 0,00                                                 | 0         | no                       | yes              | no                    | n.k.              | n.k.    | no                  | 0                     | 0                             | 0,0000                                             | 16,9                                                 | n.k.         | n.k. | n.k.                 | n.k. | 24   |     |
| 19                                         | 78          | m   | 4           | 4              | 1           | 2                             | prostate carcinoma, subcortical vasculare encephalopathy with signs of vascular dementia, meningioma, atrial fibrillation                                                                             | atherosclerosis, coronary heart disease                                                                                                                                        | AD, VD, meningioma VHD*2                                                                                                     | 1            | 100,00                                               | 3         | no                       | yes              | yes                   | yes               | yes     | yes                 | 1                     | 1                             | 0,0000                                             | 510                                                  | 28,7         | yes  | 3                    | 7    | 48   |     |
| 20                                         | 78          | f   | 1           | 1              | 0           | 1                             | subcortical vasculare encephalopathy, dementia                                                                                                                                                        | circulatory insufficiency, old myocardial infarction, pulmonary emphysema                                                                                                      | SVE, corticobasal degeneration, small bleeding near corpus callosum                                                          | 0            | 45,45                                                | 3         | yes                      | yes              | yes                   | no                | yes     | yes                 | 2                     | 2                             | 0,0305                                             | 290                                                  | 20,8         | yes  | 3                    | 6    | 48   |     |
| 21                                         | 56          | m   | 2           | 2              | 0           | 1                             | celiac disease, pneumonia, cerebellar degeneration and encephalopathy                                                                                                                                 | celiac disease, spleen atrophy, pneumonia                                                                                                                                      | Limbic- and brainstem encephalitis, old red cortical infarct                                                                 | 2            | 27,27                                                | 2         | no                       | yes              | no                    | no                | n.k.    | n.k.                | no                    | 1                             | 0                                                  | 0,2170                                               | 275          | n.k. | n.k.                 | 1    | 6    | 24  |
| 22                                         | 43          | m   | 0           | 1              | 0           | 0                             | Crohn's disease, acute myocardial infarction                                                                                                                                                          | sudden cardiac death                                                                                                                                                           | normal brain                                                                                                                 | 0            | 9,09                                                 | 0         | no                       | no               | no                    | no                | n.k.    | no                  | yes                   | 2                             | 0                                                  | 0,0185                                               | 430          | n.k. | n.k.                 | n.k. | 120  |     |
| 23                                         | 51          | m   | 0           | 0              | 0           | 0                             | bladder carcinoma, signs of infection and cognitive deficits                                                                                                                                          | bladder carcinoma, acute pancreatitis, coronary heart disease, pulmonary embolism                                                                                              | brain edema, mild SVD, neurogenic muscular atrophy with accompanied myocathion changes                                       | 0            | 36,36                                                | 2         | no                       | no               | no                    | n.k.              | n.k.    | n.k.                | no                    | 2                             | 0                                                  | 0,0108                                               | 390          | n.k. | n.k.                 | n.k. | 48   |     |
| 24                                         | 61          | f   | 0           | 1              | 0           | 0                             | ALS, atrial fibrillation, arterial hypertension, central respiratory failure                                                                                                                          | ALS, respiratory failure                                                                                                                                                       | ALS                                                                                                                          | 0            | 0,00                                                 | 1         | no                       | no               | yes                   | no                | yes     | no                  | 2                     | 2                             | 0,0597                                             | 260                                                  | n.k.         | yes  | n.k.                 | n.k. | 48   |     |
| 25                                         | 60          | f   | 4           | 1              | 0           | 1                             | polyneuropathy, arterial hypertension, hypyepidemia, hypothyreosis                                                                                                                                    | coronary heart disease, pulmonary emphysema                                                                                                                                    | lymphocytic encephalo-myelitis, inactivity-related muscular atrophy                                                          | 0            | 54,55                                                | 2         | no                       | no               | yes                   | n.k.              | n.k.    | no                  | 2                     | 2                             | 0,0180                                             | 290                                                  | n.k.         | yes  | n.k.                 | n.k. | 96   |     |
| 26                                         | 56          | m   | 0           | 1              | 0           | 0                             | pulmonary embolism, SDH and SAH, coronary heart disease, alcohol abuse, hepatocephaly, diabetes mellitus                                                                                              | coronary heart disease, liver cirrhosis, left myocardial infarction                                                                                                            | SDH, mild SAH, fortobasal hemorrhage, SVD, alcohol-related myopathy of the diaphragma                                        | 0            | 27,27                                                | 2         | yes                      | no               | no                    | yes               | n.k.    | n.k.                | no                    | 2                             | 0                                                  | 0,0039                                               | 760          | n.k. | n.k.                 | 0    | 1    | 72  |
| 27                                         | 60          | m   | 0           | 1              | 0           | 0                             | HD, pneumonia                                                                                                                                                                                         | HD                                                                                                                                                                             | pneumonia, HD                                                                                                                | 0            | 36,36                                                | 2         | no                       | no               | no                    | no                | n.k.    | n.k.                | no                    | 2                             | 0                                                  | 0,0319                                               | 300          | 23,9 | no                   | n.k. | n.k. | 72  |
| 28                                         | 59          | m   | 0           | 0              | 0           | 0                             | sepsis due to pneumokokk with meningitis, status after stroke, status after thrombosis, arterial hypertension, diabetes mellitus                                                                      | meningitis with focal encephalitis, sepsis due to pneumokokk with multiple organ failure                                                                                       | leptomeningitis with foci of meningencephalitis, old infarct in the left striatum                                            | 0            | 18,18                                                | 1         | yes                      | yes              | yes                   | yes               | yes     | no                  | no                    | 0                             | 0                                                  | 0,0158                                               | 460          | n.k. | yes                  | 0    | 1    | 48  |
| 29                                         | 0,0027      | m   | 0           | 0              | 0           | 0                             | pulmonary hypoplasia, pulmonary hypertension, mekoniumaspiration, pneumothorax, muscular dystrophy type Becker-Kiener, infection                                                                      | malformation syndrome, respiratory failure                                                                                                                                     | normal brain                                                                                                                 | 0            | 0,00                                                 | 0         | no                       | no               | no                    | n.k.              | n.k.    | no                  | 0                     | 0                             | 0,0000                                             | 8                                                    | n.k.         | n.k. | n.k.                 | n.k. | 48   |     |
| 30                                         | 69          | m   | 0           | 1              | 0           | 1                             | ALS, paresis of respiratory muscles                                                                                                                                                                   | respiratory failure                                                                                                                                                            | ALS, cerebellar microbleeds                                                                                                  | 0            | 54,55                                                | 2         | no                       | no               | no                    | no                | no      | no                  | no                    | 2                             | 0                                                  | 0,0713                                               | 340          | 19,5 | yes                  | n.k. | n.k. | 96  |
| 31                                         | 52          | m   | 0           | 1              | 0           | 0                             | status after surgery by diverticulitis of the colon, glomerulonephritis, cognitive impairment, pneumonia, gastrointest. bleeding, neurotic syndrome                                                   | multiple organ failure                                                                                                                                                         | inactivity related muscular atrophy, no morphological correlate for cognitive impairment                                     | 0            | 45,45                                                | 2         | no                       | no               | no                    | n.k.              | n.k.    | no                  | no                    | 2                             | 0                                                  | 0,0110                                               | 430          | n.k. | n.k.                 | 0    | 1    | 48  |
| 32                                         | 52          | f   | 1           | 1              | 0           | 1                             | AML, status after bone marrow transplantation, COPD by nikotin abuse, vascular malformations at the liver vessels, status after ASD, posterior reversible encephalopathy and intracerebral hemorrhage | AML, status after surgery of an ASD                                                                                                                                            | Fresh ICB, posterior reversible encephalopathy syndrome parieto-occipital, inactivity-related muscular atrophy               | 0            | 0,00                                                 | 2         | yes                      | no               | no                    | no                | no      | no                  | no                    | 0                             | 0                                                  | 0,0000                                               | 390          | 22,3 | no                   | 0,5  | 6    | 24  |
| 33                                         | 54          | f   | 0           | 1              | 0           | 0                             | schizophrenia, SDH, pulmonary embolism?, thabdomyolysis?                                                                                                                                              | pulmonary embolism                                                                                                                                                             | chronic parmyelitis with neurogenic muscular atrophy, SDH, capillary telangiectasia at the level of the left cirsulate arsus | 0            | 18,18                                                | 1         | no                       | no               | no                    | no                | yes     | no                  | no                    | 2                             | 0                                                  | 0,0051                                               | 360          | 34,6 | no                   | n.k. | n.k. | 24  |
| 34                                         | 46          | f   | 0           | 1              | 0           | 0                             | ALS                                                                                                                                                                                                   | ALS                                                                                                                                                                            | ALS                                                                                                                          | 0            | 0,00                                                 | 2         | no                       | no               | no                    | no                | no      | no                  | 0                     | 0                             | 0,0064                                             | 205                                                  | 20,0         | no   | n.k.                 | n.k. | 120  |     |
| 35                                         | 74          | f   | 0           | 1              | 0           | 0                             | implantation of a hip prothesis, focal epileptic seizures, respiratory failure                                                                                                                        | atherosclerosis, decompensated left ventricular failure                                                                                                                        | AGD, SVE                                                                                                                     | 0            | 80,91                                                | 3         | no                       | no               | yes                   | yes               | yes     | no                  | no                    | 2                             | 2                                                  | 0,0213                                               | 530          | 27,3 | yes                  | 0    | 1    | 24  |
| 36                                         | 36          | m   | 0           | 0              | 0           | 0                             | EBV-infection, sepsis, vena porta thrombosis and liver failure, hemochromatosis, hemochromatosis                                                                                                      | liver failure with consecutive multiple organ failure                                                                                                                          | infarct of the adenohypophysis                                                                                               | 0            | 0,00                                                 | 0         | no                       | no               | no                    | n.k.              | n.k.    | no                  | no                    | 2                             | 0                                                  | 0,0000                                               | 430          | n.k. | no                   | 0    | 1    | 24  |
| 37                                         | 53          | m   | 0           | 1              | 0           | 0                             | coronary heart disease, myocardial infarction, hepatopathy                                                                                                                                            | coronary heart disease, myocardial infarction                                                                                                                                  | Null cell microadenoma of the adenohypophysis                                                                                | 0            | 18,18                                                | 0         | no                       | no               | no                    | n.k.              | n.k.    | yes                 | 2                     | 0                             | 0,0163                                             | 500                                                  | n.k.         | n.k. | 0                    | 1    | 72   |     |
| 38                                         | 63          | m   | 1           | 1              | 0           | 1                             | stenosis of the aorta, IgA-nephropathy, CMV infection                                                                                                                                                 | atherosclerosis, heart failure, pulmonary hypertension, liver cirrhosis, renal failure, aortic valve stenosis, failure of the mitral and tricuspidal valves, edema of the lung | lacunar infarct left thalamus, fresh microinfarct in CA1, SVD                                                                | 0            | n.d.                                                 | 2         | no                       | yes              | no                    | no                | no      | no                  | 2                     | 0                             | 0,0703                                             | 650                                                  | 24,0         | no   | 0                    | 1    | 120  |     |
| 39                                         | 46          | m   | 0           | 1              | 0           | 0                             | right ventricular failure by tricuspidal valve failure                                                                                                                                                | normal brain                                                                                                                                                                   | normal brain                                                                                                                 | 0            | 0,00                                                 | 0         | no                       | no               | no                    | n.k.              | n.k.    | no                  | no                    | 0                             | 0                                                  | 0,0206                                               | 485          | n.k. | no                   | 0    | 1    | 29  |
| 40                                         | 64          | f   | 0           | 1              | 0           | 0                             | malignant melanoma                                                                                                                                                                                    | pulmonary embolism, metastasizing malignant melanoma                                                                                                                           | multiple metastases of a malignant melanoma, AGD                                                                             | 0            | 54,55                                                | 2         | no                       | no               | no                    | no                | no      | no                  | 2                     | 0                             | 0,0000                                             | 250                                                  | 28,7         | no   | 0                    | 1    | 48   |     |
| 41                                         | 49          | m   | 0           | 0              | 0           | 0                             | mitral valve failure, cerebral and peripheral (lower limb) ischmia, ventricular fibrillation                                                                                                          | endocarditis of the mitral valve                                                                                                                                               | multiple lacunar infarcts and microinfarcts, large fresh infarct of the right basal ganglia, SVD                             | 0            | 100,00                                               | 2         | no                       | yes              | yes                   | no                | no      | no                  | yes                   | 0                             | 0                                                  | 0,0229                                               | 850          | 23,7 | no                   | 0    | 1    | 8   |
| 42                                         | 75          | m   | 2           | 2              | 0           | 1                             | atrial fibrillation, ICB, infarct of the thalamus, cystic pancreatic lesions, pneumonia                                                                                                               | coronary heart disease, pneumonia, chronic pancreatitis, pancreatic carcinoma, diabetes mellitus, renal failure                                                                | multiple brain infarcts (thalamus, midbrain, parietal lobe), old microinfarct in CA1, lymphocytic meningoencephalitis        | 0            | 36,36                                                | 1         | no                       | yes              | yes                   | yes               | n.k.    | yes                 | no                    | 2                             | 2                                                  | 0,0773                                               | 425          | n.k. | n.k.                 | 0    | 1    | 24  |
| 43                                         | 72          | f   | 4           | 4              | 2           | 2                             | dementia, arterial hypertension, obesity, lung carcinoma with pleurocarcinosis, atrial fibrillation                                                                                                   | coronary heart disease                                                                                                                                                         | AD, metastases of a lung adenocarcinoma, SVD, lacunar infarct of the thalamus                                                | 1            | 45,45                                                | 2         | no                       | yes              | yes                   | yes               | yes     | no                  | 2                     | 2                             | 0,2221                                             | 370                                                  | n.k.         | n.k. | 1                    | 6    | 12   |     |
| 44                                         | 51          | m   | 0           | 1              | 0           | 0                             | multiple sclerosis, bladder carcinoma, diabetes mellitus, pneumonie                                                                                                                                   | pneumonia                                                                                                                                                                      | multiple sclerose-Maarburg type/ subtype II                                                                                  | 0            | 33,33                                                | 0         | no                       | no               | yes                   | yes               | yes     | no                  | no                    | 2                             | 0                                                  | 0,0544                                               | 400          | n.k. | yes                  | 3    | 7    | 24  |
| 45                                         | 45          | m   | 0           | 0              | 0           | 0                             | myocardial infarction, coronary heart disease                                                                                                                                                         | myocardial infarction, coronary heart disease                                                                                                                                  | normal brain                                                                                                                 | 0            | 0,00                                                 | 1         | no                       | no               | no                    | n.k.              | n.k.    | yes                 | 2                     | 0                             | 0,0337                                             | 410                                                  | n.k.         | no   | 0                    | 1    | 24   |     |
| 46                                         | 73          | f   | 2           | 1              | 0           | 1                             | Obesity, arterial hypertension, renal cell carcinoma, gastric ulcer, decompensated left ventricular failure                                                                                           | decompensated left ventricular failure by status after renal cell carcinoma                                                                                                    | ICBs (basal ganglia, thalamus, brain stem cerebellum), SVD                                                                   | 0            | 66,67                                                | 2         | yes                      | no               | yes                   | yes               | n.k.    | n.k.                | no                    | 2                             | 2                                                  | 0,1154                                               | 725          | n.k. | n.k.                 | 0    | 1    | 30  |
| 47                                         | 35          | m   | 0           | 0              | 0           | 0                             | GIST, endokrine carcinoma of the colon, pancreatic encephalitis, factor V Leiden-mutation                                                                                                             | GIST, endokrine carcinoma of the colon, dilatative cardiomyopathy                                                                                                              | limbic encephalitis                                                                                                          | 0            | 0,00                                                 | 0         | no                       | no               | no                    | no                | no      | no                  | 2                     | 0                             | 0,0259                                             | 640                                                  | 27,5         | no   | 0                    | 1    | 72   |     |
| 48                                         | 85          | f   | 0           | 2              | 0           | 0                             | arterial hypertension, diabetes mellitus, COPD, chronic renal failure, duodenal perforation, sepsis, pneumonia                                                                                        |                                                                                                                                                                                |                                                                                                                              |              |                                                      |           |                          |                  |                       |                   |         |                     |                       |                               |                                                    |                                                      |              |      |                      |      |      |     |

## Supplementary Tab. 2: Proteins observed for its presence in BD inclusions in cardiomyocytes

|                                                         | Cardiomyocyte inclusion bodies | Antibodies and staining protocol                                                                           |
|---------------------------------------------------------|--------------------------------|------------------------------------------------------------------------------------------------------------|
| p62/SQSTM1                                              | +                              | Mouse; Clone 3/p62 LCK ligand, BD Transduction Laboratories, Mountain View, CA, USA, 1:500                 |
| Ubiquitin                                               | +                              | Polyclonal rabbit; Ubiquitin, DAKO, Glostrup, Denmark, 1/100                                               |
| Ubiquilin                                               | +                              | Polyclonal rabbit; Anti-UBQLN, Acris Antibodies, San Diego, CA, USA, 1/100, microwave pretreatment         |
| APP-N-terminus (22C11)                                  | +                              | Mouse; Clone, 22C11, Millipore, 1/75, microwave pretreatment                                               |
| APP-N-terminus (9023)                                   | (+)                            | Polyclonal rabbit: 9023, ThermoScientific, Fremont, USA, 1/100, microwave pretreatment                     |
| APP-D-Epitope (D-epitope = DALMPSLT)                    | -                              | Polyclonal rabbit; 9478D, 9480D, (18), 1/50, microwave pretreatment                                        |
| APP-M-Epitope (M-epitope = MISEPRISYG)                  | -                              | Polyclonal rabbit; 9475M, 9476M, (18), 1/50, microwave pretreatment                                        |
| A $\beta$ <sub>1-17</sub> (6E10)                        | -                              | Mouse; Clone 6E10, Covance, Dedham, USA, 1/1000, formic acid pretreatment                                  |
| A $\beta$ <sub>17-24</sub> (4G8)                        | -                              | Mouse; Clone 4G8, Covance, Dedham, USA, 1/5000, formic acid pretreatment                                   |
| A $\beta$ (3552)                                        | -                              | Polyclonal rabbit; 3552, (44), 1/1000, formic acid pretreatment                                            |
| APLP2                                                   | -                              | Polyclonal rabbit: ThermoScientific, Rockford, USA, 1/200, microwave pretreatment                          |
| Smooth muscle actin,                                    | -                              | Mouse; Clone 1A4, DAKO, Glostrup, Denmark, 1/200, microwave pretreatment                                   |
| Myosin (fast twitch)                                    | -                              | Mouse; Clone MY-32, Bio-Genex, The Hague, Netherlands, 1/50, microwave pretreatment                        |
| abnormal phosphorylated $\tau$ -protein                 | -                              | Mouse; Clone AT-8, Thermo-Scientific – Pierce Biotechnology, Rockford, IL, USA, 1/1,000                    |
| pTDP43 (phosphorylated transactive DNA binding protein) | -                              | Polyclonal rabbit; pS409/410-2, Cosmo Bio Co., Ltd, Tokyo, Japan, 1/10000, microwave pretreatment          |
| TPD43                                                   | -                              | Mouse; Clone 2E2-D3, Novus Biologicals, Littleton, CO, USA, 1:2000, formic acid and microwave pretreatment |
| $\alpha$ -synuclein                                     | -                              | Mouse; Clone KM51, Leica Biosystems – Novocastra, Newcastle, UK, 1/40, formic acid pretreatment            |
| CD-56                                                   | -                              | Mouse; Clone BC56C04, Biocare, Concord, CA, USA, 1/50, microwave pretreatment                              |
| Desmin                                                  | -                              | Mouse; Clone D33, Linaris, Dossenheim, Germany, 1/100                                                      |
| Filamin-C                                               | -                              | Polyclonal rabbit; anti-FLNC, HPA006135, Sigma-Aldrich Chemie Gmbh, Munich, Germany                        |

### References:

- (18) Willem, M. et al.  $\eta$ -Secretase processing of APP inhibits neuronal activity in the hippocampus. *Nature* (2015).
- (44) Page, R. M. et al. Beta-amyloid precursor protein mutants respond to gamma-secretase modulators. *J Biol Chem* 285, 17798-17810 (2010).

**Supplementary Fig. 1:** Positive controls for immunohistochemistry (**A-D** visualized with avidin-biotin complex and DAB, **E-H** visualized with carbocyanine (Cy) labelled secondary antibodies): **A:** p62/SQSTM1-staining of cytoplasmic dipeptide repeat inclusions in CA4 neurons (arrows) of a case with ALS carrying a C9Orf72 hexanucleotide mutation. The lacking nuclear signal serves as intrinsic negative control. **B, C:** Neuritic plaques (arrows) and less strongly the neuropil and the cytoplasm of neurons of AD brain (**B:** temporal neocortex; **C:** hippocampal sector CA1) are marked with the antibodies against the N-terminus of APP (22C11) (**B**) and the A $\eta$  region of APP (D-epitope antibody) (**C**). The nuclei are not stained and serve as intrinsic negative controls. **D:** The anti-A $\beta_{1-17}$  antibody 6E10 clearly stains amyloid plaques (arrows) in AD temporal neocortex whereas the neighboring neuropil remains negative. **E, F:** Dipeptide inclusions in the granule cell layer of the cerebellum of an ALS case carrying the C9Orf72 hexanucleotide el disease; SVE = subcortical vascular encephalopathy; VD = vascular dementia; **E:** Cy5-labelled secondary antibodies (E and with the ubiquitin antibody-coupled on biotinylated anti-mouse Fab fragments and labelled with Cy2-conjugated streptavidin (**F**). The inclusions stained with both antibodies in this double labelled section are indicated by arrowheads. Ubiquitin antibodies also mark other lesions that are not detected by the p62/SQSTM1 antibody. **G:** The antibody against the M-epitope of the APP-A $\eta$  region stains a neuritic plaque with dystrophic neurites (arrowheads) in the parietal cortex of an AD brain (the original Cy 3 color is shown here; the image is not recoded into blue as it is done for triple label immunofluorescence figures!). **H** Amyloid plaque (arrowhead) in the parietal cortex of an AD brain detected with the polyclonal A $\beta$  antibody 3552 visualized with Cy3-labelled secondary antibodies (the original color is shown here; the image is not recoded into blue as it is done for triple label immunofluorescence figures!).

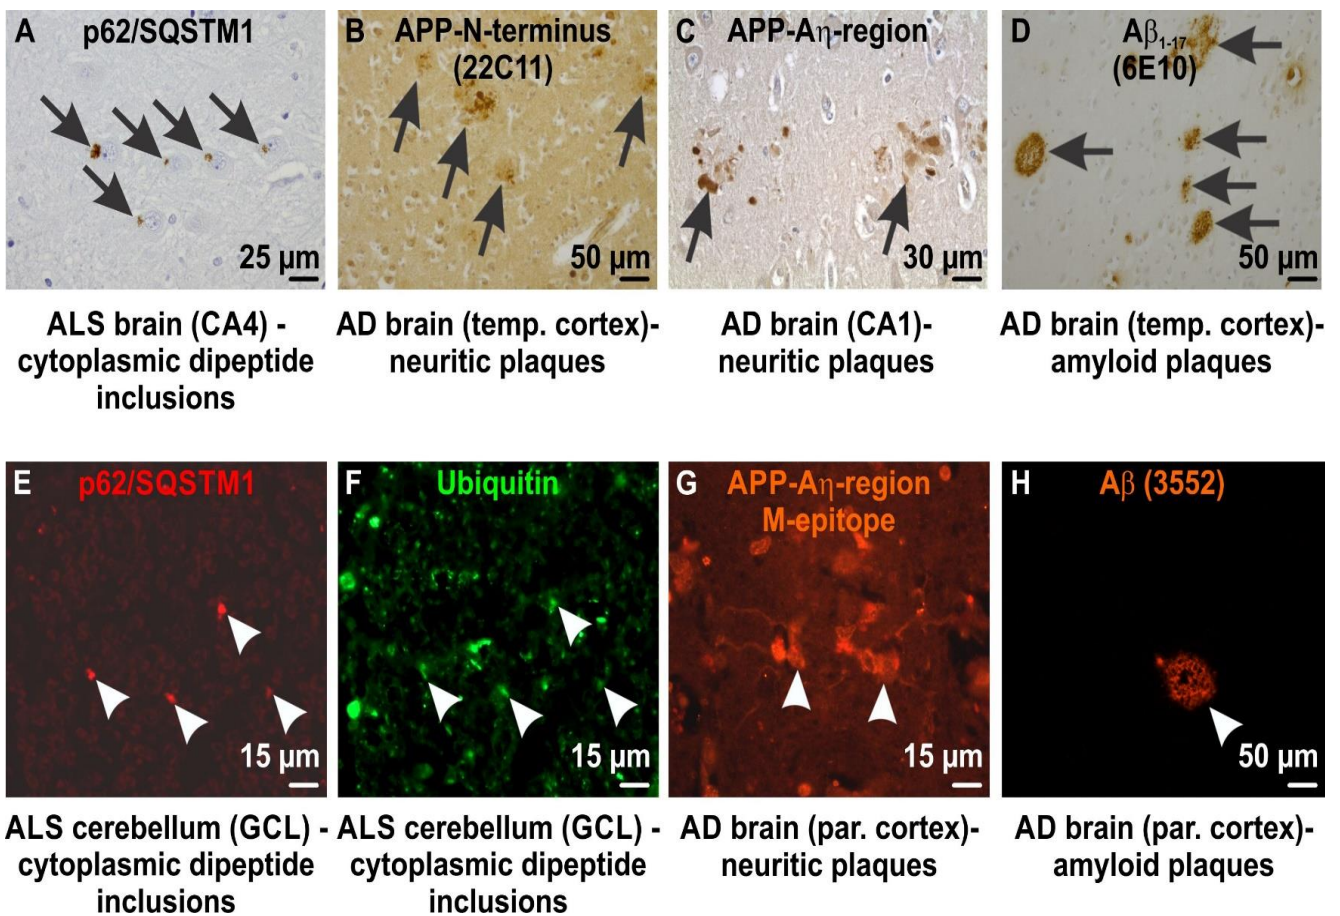

Supplement: 41598_2018_34808_MOESM1_ESM.pdf [file 41598_2018_34808_MOESM1_ESM.pdf]
